# Supplementary material for: Epigenetic and transcriptomic characterization reveals progression markers and essential pathways in clear cell renal cell carcinoma
Source: PubMed Central journal article supplement (PMC10042888; doi:10.1038/s41467-023-37211-7), 2023-03-27
Supplement: 41467_2023_37211_MOESM2_ESM.pdf [file 41467_2023_37211_MOESM2_ESM.pdf]

## **Description of Additional Supplementary Files**

File Name: Supplementary Data 1

Description: Clinical information of the participants and specimen information.

File Name: Supplementary Data 2

Description: Marker genes used for cell-type annotation.

File Name: Supplementary Data 3

Description: Tumor-specific markers and differentially expressed genes and differentially accessible peaks and TF motifs.

File Name: Supplementary Data 4

Description: Selected pathways, epithelial, and EMT scores among tumor clusters.

File Name: Supplementary Data 5

Description: BAP1/PBRM1-associated differentially expressed genes and accessible peaks.
